1 **TITLE**

2 Distribution and functional potential of photoautotrophic bacteria in alkaline hot springs

3  
4 Anastacia C. Bennett<sup>1</sup>

5 Senthil K. Murugapiran<sup>1</sup>

6 Eric D. Kees<sup>1</sup>

7 Trinity L. Hamilton<sup>1,2\*</sup>

8

9

10 <sup>1</sup>Department of Plant and Microbial Biology, University of Minnesota, St. Paul, MN 55108

11

12 <sup>2</sup>Biotechnology Institute, University of Minnesota, St. Paul, MN 55108

13

14

15 **CORRESPONDENCE:**

16 Trinity L. Hamilton. Department of Plant and Microbial Biology, University of Minnesota, St. Paul, USA,

17 55108. Phone: +16126256372\_Email: [trinityh@umn.edu](mailto:trinityh@umn.edu); ORCID: 0000-0002-2282-4655

18

19

20

21

22

23

24

25

26

27

28

29

30

31

32

33

34

35

36

37

38 **ABSTRACT (250 words)**

39

40 Alkaline hot springs in Yellowstone National Park (YNP) provide a framework to study the relationship  
41 between photoautotrophs and temperature. Previous work has focused on cyanobacteria (oxygenic  
42 phototrophs), but anoxygenic phototrophs are critical parts of the evolutionary history of life on Earth and  
43 and are abundant across temperature gradients in alkaline hot springs. However, many questions remain  
44 regarding the ecophysiology of anoxygenic photosynthesis due to the taxonomic and metabolic diversity  
45 of these taxa. Here, we examined the distribution of genes involved in phototrophy and carbon and  
46 nitrogen fixation in eight alkaline (pH 7.3-9.4) hot spring sites approaching the upper temperature limit of  
47 photosynthesis (~72°C) in YNP using metagenome sequencing. Genes associated with cyanobacteria are  
48 abundant throughout our data and more diverse at temperatures > 63°C, genes for autotrophic Chloroflexi  
49 are more abundant in sites > 63°C and genes associated with phototrophic Chloroflexi are abundant  
50 throughout. Additionally, we recovered deep branching nitrogen fixation genes from our metagenomes,  
51 which could inform the evolutionary history of nitrogen fixation. Lastly, we recovered 25 metagenome  
52 assembled genomes of Chloroflexi. We found distinct differences in carbon fixation genes in *Roseiflexus*  
53 and *Chloroflexus* bins, in addition to several novel Chloroflexi bins. Our results highlight the  
54 physiological diversity and evolutionary history of the understudied, anoxygenic autotrophic Chloroflex.  
55 Furthermore, we provide evidence that genes involved in nitrogen fixation in Chloroflexi is more  
56 widespread than previously assumed.

57

58

59 **IMPORTANCE (150 words)**

60

61 Photosynthetic bacteria in hot springs are of great importance to both microbial evolution and ecology  
62 because they are responsible for the rise of oxygen and are critical to nutrient cycling. While a large body  
63 of work has focused on the oxygenic photosynthesis in cyanobacteria, many questions remain regarding  
64 the metabolic potential of anoxygenic phototrophs but are further compounded by their metabolic and  
65 taxonomic diversity. Here, we have recovered several novel metagenome bins and quantified the  
66 distribution of key genes involved in carbon and nitrogen metabolism in both oxygenic and anoxygenic  
67 phototrophs. Together, our results add to the body of work focusing on photosynthetic bacteria in hot  
68 springs in Yellowstone National Park.

69

70

71

## 72 INTRODUCTION

73 A rich history of research on microbial communities in hot springs in Yellowstone National Park  
74 (YNP) has revealed that photoautotrophic bacteria are the main primary producers in alkaline hot springs  
75 > 60°C to 72°C (reviewed in 1). Alkaline hot springs > ~56°C are typically devoid of eukaryotic life,  
76 contain fine-scale temperature gradients and, therefore, are excellent environments to study the  
77 ecophysiology of photoautotrophs *in situ* (2). Historically, cyanobacteria have been the focus of these  
78 studies as they are the only bacteria capable of oxygenic photosynthesis—a process that arose >2.2 billion  
79 years ago and is of great importance to Earth's history (3). The distribution of cyanobacterial species in  
80 Mushroom and Octopus Springs, two alkaline hot springs in YNP, has been described at ~1°C resolution  
81 (4–7), revealing ecotypes that are highly adapted to specific temperatures. Additionally, cyanobacterial  
82 diversity increases with decreasing temperature (8). While anoxygenic phototrophs are also present in  
83 high temperature alkaline springs (5,6,8–10), many questions remain regarding their metabolic potential  
84 and contribution to carbon and nitrogen cycling *in situ*, which is complicated by their taxonomic and  
85 metabolic diversity.

86 While Cyanobacteria have been widely studied for several decades, researchers have only begun  
87 to ascertain the metabolic potential of phototrophic Chloroflexi. In alkaline, high temperature hot springs,  
88 cyanobacteria are the only organisms that perform oxygenic photosynthesis, using two photosystems in  
89 concert to harvest electrons from water for metabolic processes like carbon fixation. In contrast to  
90 oxygenic phototrophs, anoxygenic phototrophs require one light-harvesting reaction center complex –  
91 either type I or type II – and have been observed in seven additional bacterial phyla that persist in alkaline  
92 hot springs (1). Of these phyla, Chloroflexi are the most abundant anoxygenic phototrophs in alkaline hot  
93 springs > 60°C, while other anoxygenic phototrophs (e.g. Chlorobi and *Candidatus Chloracidobacterium*  
94 *thermophilum*), are usually present but less abundant (8,9,11,12). At present, phototrophy in hot spring  
95 Chloroflexi is limited to class *Chloroflexales*, with the exception of the novel photoheterotroph,  
96 *Candidatus Roseilineae* in class *Anaerolineae* (13). To date, there have been a handful of isolate and *in*  
97 *situ* studies on *Chloroflexus* and *Roseiflexus*. For example, in pure culture, *Roseiflexus castenholzii* has  
98 not been grown in the absence of fixed carbon or nitrogen, yet *Roseiflexus* genomes recovered from  
99 alkaline hot springs contain genes involved in both of these processes (14). Additionally, we observe  
100 *Chloroflexus* in alkaline hot springs up to ~70°C; however, in isolate studies, carbon fixation using the 3-  
101 hydroxypropionate bicycle (3HPB) by *Chloroflexus* has not been demonstrated at temperatures > 55°C

102 (15). Therefore, many questions remain regarding the distribution and metabolic potential of the  
103 phototrophs in class *Chloroflexales* and of novel classes within the phylum.

104         Photosynthesis is essential to cycle carbon in hot springs. However, these environments are also  
105 nitrogen limited, which allows nitrogen-fixing bacteria to thrive in hot springs. Because oxygen solubility  
106 decreases as a function of increased temperature, oxygen concentrations are often low, creating conditions  
107 that are suitable for the production of the oxygen-sensitive enzyme, nitrogenase (16,17). Nitrogenase is an  
108 iron-sulfur complex containing one of three metals harbored in the active site: molybdenum (Mo), iron  
109 (Fe) or vanadium (V). All three varieties exist in nitrogen limited environments, but Mo-nitrogenase is the  
110 most common and is encoded by *nif* genes (18,19). *nif* genes are dispersed throughout environments on  
111 Earth, especially areas that are typically nitrogen-limited, including alkaline hot springs in YNP (20,21).  
112 In-depth studies quantifying the distribution of *nifH* (which encodes the iron protein (NifH) in  
113 nitrogenase) and potential nitrogenase activity have been conducted in a number of acidic hot springs >  
114 55°C in YNP (22,23). These studies revealed that diazotrophs in acidic hot springs are highly adapted to  
115 local conditions. In alkaline hot springs, transcriptional activity of *nifH* in *Leptococcus* (Cyanobacteria,  
116 *Synechococcus* renamed to *Leptococcus* in (24)) species was monitored over a diel cycle in 53-63°C mats  
117 which revealed an increase in activity at the end of the day, once mats turned anoxic (16,25). However,  
118 broader studies linking the distribution of *nifH* to phototrophic community composition have not been  
119 conducted in alkaline springs > 63°C, to our knowledge. Additionally, *Roseiflexus* genomes contain *nif*  
120 genes, but they lack the full protein suite required to build a functional nitrogenase and likely do not fix  
121 carbon *in situ*, but the functional purpose of NifH in *Roseiflexus* remains unknown.

122         Previous work in YNP has largely relied on single marker gene or metagenome assembled  
123 genome (MAG, herein referred to as 'bin') abundance to define the range of photosynthesis in alkaline hot  
124 springs *in situ* (1-4). Our previous work suggested that Chloroflexi and cyanobacteria were highly  
125 abundant in alkaline hot springs ranging from 60°C to 72°C (12). Given the abundance of cyanobacteria  
126 and Chloroflexi in these sites and the crucial role that they play in nitrogen and carbon cycling, we sought  
127 to determine the distribution and functional potential of phototrophic bacteria in a subset of hot springs  
128 from Hamilton *et al.* 2019. Here, we overcame the limitations of primer bias in single gene surveys and  
129 potentially contaminated/incomplete metagenome bins and examined genes and pathways associated with  
130 phototrophy and nitrogen fixation in metagenomes as has been proven informative in other systems (23).  
131 We sequenced metagenomes from eight alkaline hot spring samples in YNP with temperatures ranging  
132 from 62°C to 71°C (Table 1). We found that 1) genes associated with cyanobacterial photoautotrophy are  
133 abundant throughout our data and more diverse at temperatures > 63°C, 2) genes for autotrophic  
134 Chloroflexi are more abundant in sites > 63°C, 3) genes associated with phototrophic Chloroflexi are  
135 abundant throughout, and 4) we recovered deep branching nitrogen fixation genes from our

136 metagenomes. Lastly, we binned our metagenome assemblies and recovered 25 Chloroflexi bins. We  
137 found distinct differences in carbon fixation genes in *Roseiflexus* and *Chloroflexus* bins, in addition to  
138 several novel Chloroflexi bins. Together, these results add to the body of work on photoautotrophic  
139 bacteria in alkaline hot springs which is critical to solving the evolutionary history and ecophysiology of  
140 nitrogen fixation and photosynthesis in bacteria.

141

## 142 **Results and Discussion**

### 143 *Overview of site geochemistry and metagenome assemblies.*

144 In Hamilton *et al.* 2019 (12), we surveyed the distribution and putative activity of phototrophy in  
145 22 hot springs using 16S rRNA gene sequencing, <sup>13</sup>C and <sup>15</sup>N isotopic signatures and photosynthetic  
146 microcosm experiments. We report that a large proportion of the population in sites > 60°C and pH > 7  
147 are putative phototrophic Chloroflexi and Cyanobacteria, namely *Leptococcus*, *Roseiflexus* and  
148 *Chloroflexus*. Our 2019 study, in addition to several other studies, suggest that Cyanobacteria and  
149 phototrophic Chloroflexi are the dominant photoautotrophs in alkaline hot springs from 60°C to the upper  
150 temperature limit of photosynthesis (72°C) (1,5,14,28,29). To this end, we generated metagenome  
151 sequences from a subset of samples (n=8, Table 1) to determine the distribution of specific genes  
152 involved in photoautotrophy and nitrogen fixation in YNP alkaline hot springs that approach the upper  
153 temperature limit of photosynthesis. The sites range in temperature from 62°C to 71°C and pH between 7  
154 and 9 (Table 1, (12)). The average number of reads between the eight metagenomes was 830473, with a  
155 standard deviation of 267811 reads (Table S1). In our metagenome assemblies, the maximum number of  
156 reads was from site 629F (1187870 reads) while the lowest number of reads was from 626C (375420

**Table 1. Geochemistry of sites.**

| Site ID | JGI Genome ID | Site Name<br>(corresponds with<br>Hamilton <i>et al.</i> 2019) | pH   | Temperature<br>(°C) | Sulfide<br>(μM) | δ <sup>13</sup> C<br>(‰) | Fe <sup>2+</sup><br>(μM) | SiO <sub>2</sub><br>(mM) | δ <sup>15</sup> N<br>(‰) | SO <sub>4</sub><br>(mM) | PO <sub>4</sub><br>(mM) | Mo<br>(nM) |
|---------|---------------|----------------------------------------------------------------|------|---------------------|-----------------|--------------------------|--------------------------|--------------------------|--------------------------|-------------------------|-------------------------|------------|
| 626A    | 3300028606    | Rabbit Creek OF1                                               | 9.14 | 68.40               | 0.34            | -21.97                   | 0.00                     | 3.14                     | -0.93                    | 0.20                    | 5.43                    | 290.61     |
| 626B    | 3300028609    | Rabbit Creek OF2                                               | 9.24 | 62.30               | 0.44            | -17.25                   | 0.00                     | 2.48                     | -1.32                    | 0.19                    | 5.40                    | 287.30     |
| 626C    | 3300028611    | Smoking Gun Spring<br>OF                                       | 9.44 | 62.40               | 19.00           | -12.34                   | 0.00                     | 4.19                     | -2.38                    | 0.16                    | 6.44                    | 304.56     |
| 626D    | 3300028818    | Rabbit Creek OF3                                               | 9.29 | 62.30               | 0.25            | -17.65                   | 0.00                     | 3.43                     | -2.09                    | 0.19                    | 5.32                    | 301.98     |
| 629B    | 3300028893    | Boulder Geyser OF2                                             | 8.68 | 68.50               | 45.53           | -17.54                   | 0.90                     | 2.13                     | 4.09                     | 0.19                    | 3.18                    | 483.06     |
| 629F    | 3300028816    | Mouthful Geyser OF2<br>photo                                   | 8.80 | 71.00               | 3.12            | -20.55                   | 2.33                     | 4.63                     | 4.12                     | 0.16                    | 7.15                    | 259.47     |
| 629H    | 3300028617    | Stumped Spring OF2<br>photo                                    | 8.56 | 69.40               | 1.25            | -22.75                   | 0.36                     | 3.96                     | 4.26                     | 0.15                    | 9.07                    | 267.31     |
| 630D    | 3300028820    | Mixy Fritzy                                                    | 7.30 | 62.70               | 0.87            | -20.00                   | 0.12                     | 3.71                     | 2.82                     | 1.39                    | 4.68                    | 683.71     |

157 reads) (Table S1). Site 626B contained the highest number of open reading frames, 332336 (ORFs, e.g.  
 158 genes), while 626C had the lowest number of genes, 150190 (Table S1).

159  
 160

161 *Photosynthetic reaction center alpha diversity varies with temperature.*

162 Oxygenic photosynthesis is a remarkable metabolism that involves two photosystems,  
 163 Photosystem I (PSI) and Photosystem II (PSII), working in concert to harvest electrons from water to fuel  
 164 carbon fixation and other cellular processes. PSII houses the oxygen evolving complex where light energy  
 165 is captured to liberate electrons from water — a process that requires manipulation of five proteins  
 166 (encoded by *psb* genes) surrounding the oxygen evolving complex (30). In our data, we quantified the  
 167 abundance of three *psb* genes: *psbA*, *psbB* and *psbD*. *psbA* and *psbD* encode for the D1 and D2 proteins,  
 168 respectively, which both serve to ligate the redox active components in PSII and are highly  
 169 transcriptionally regulated in Cyanobacteria (31,32). *psbB* encodes CP47, a chlorophyll binding protein  
 170 crucial to forming a stable PSII reaction center (33). In our metagenomes, abundance of *psb* genes varied  
 171 between sites (Figure 1). We observed larger mean abundances of *psb* genes at temperatures above 68°C  
 172 and the highest mean abundance of *psb* genes occurred in the site with the highest temperature (71°C,  
 173 629F, Figure 1), while the lowest mean abundance was observed at 69.4°C (site 629H), suggesting other  
 174 factors limit cyanobacteria in 629H. However, in sites < 63°C, we recovered more copies of *psb* genes,  
 175 suggesting higher alpha diversity within the cyanobacteria population or that single species harbor  
 176 multiple copies of the *psb* genes. Previous work has shown that cyanobacterial diversity in alkaline hot  
 177 springs decreases with increasing temperature and that *Leptococcus* species, which contain up to three  
 178 copies of *psbA* (4) are most abundant in these conditions (8,9,12).

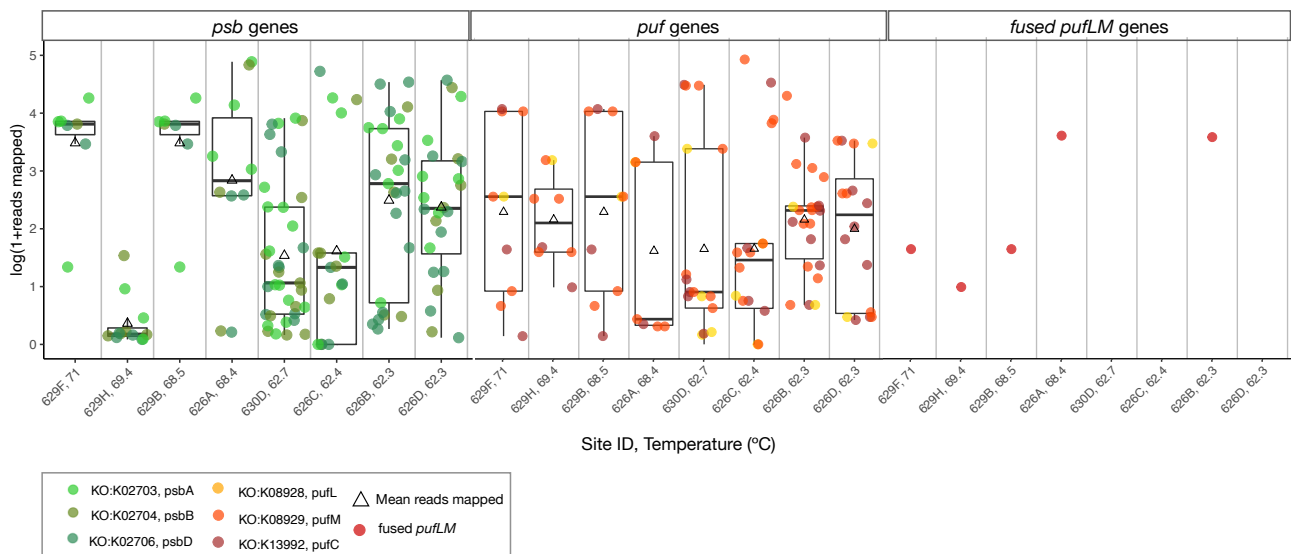

**Figure 1. Distribution of photosynthetic machinery with temperature.**

The overall abundance (natural log of 1 + reads mapped) of genes that encode for Cyanobacterial photosystem II (*psb*) and type II anoxygenic photosynthesis reaction centers (*puf* and fused *pufLM*) are shown as box plots for each site. Triangles represent the mean abundance for the gene set and dots represent individual gene abundances, shaded by the corresponding photosystem or reaction center gene. Box plot outliers were removed. Sites are ordered by decreasing temperature.

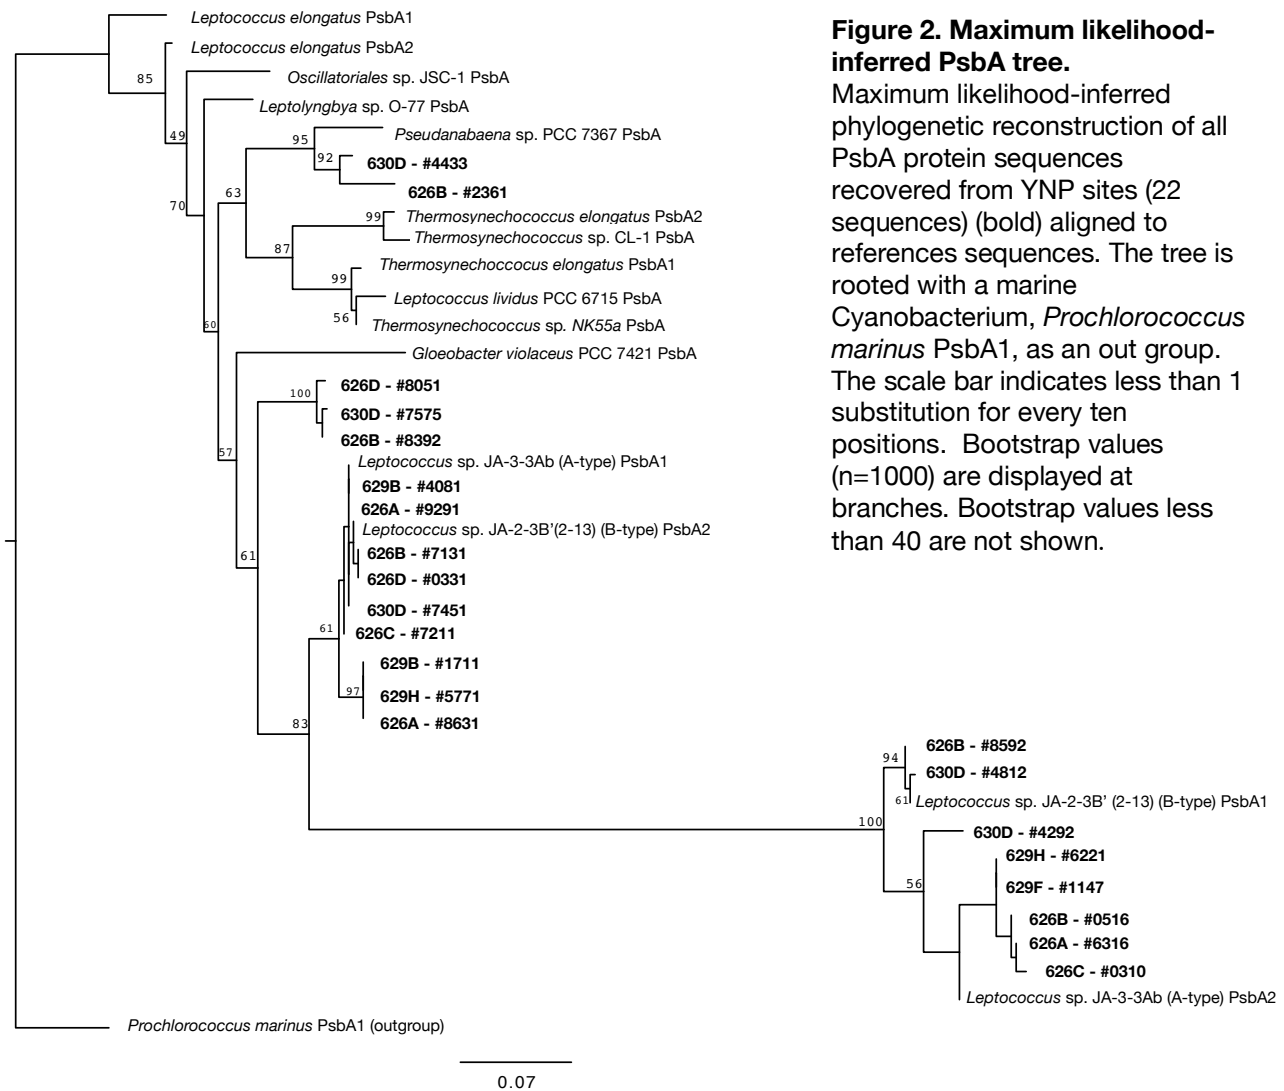

179

180 In all organisms that perform oxygenic photosynthesis, the *psbA* gene encodes the D1 protein —  
 181 a core protein of photosystem II. Several cyanobacteria genomes contain multiple copies and variant  
 182 forms of the *psbA* gene to rapidly repair the D1 protein or invoke a variant isoform in response to  
 183 environmental conditions (32). Typically, cyanobacteria encode a ‘standard’ form (usually *psbA1*),  
 184 expressed under normal conditions, and a ‘stress-induced’ form (*psbA2-n*), expressed under high-stress  
 185 conditions such as low temperature, high UV irradiance or microaerobic conditions (31). For example, in  
 186 marine cyanobacteria, the stress-induced isoform (encoded by *psbA2*) is preferentially expressed under  
 187 high UV conditions (34). Fine-scale sampling of *Leptococcus* in Octopus Spring revealed there are five  
 188 *Leptococcus* ecotypes (A'', A', A, B', and B, in order of decreasing thermotolerance) that persist between  
 189 73°C to 50°C and are adapted to specific temperatures (7,35). Reference sequences from an A-type and  
 190 B'-type ecotype – *Leptococcus yellowstonii* JA-3-3Ab and *Leptococcus springii* JA-2-3B'a(2-13)  
 191 respectively (35)– were used to identify *psbA* genes in our samples. Henceforth, we will refer to the

192 *Leptococcus* A and B 'ecotypes, which respectively occupy temperature ranges of ~55-68°C and ~50-  
193 62°C, as either A-type or B'-type. Each of the YNP *Leptococcus* genomes contain two to three variants of  
194 the *psbA* gene, but the environmental conditions that select for strains that harbor multiple copies is  
195 unknown.

196 In the present study, we recovered several *Leptococcus*-like PsbA sequences. To determine  
197 whether they were most closely related to the A- or B'-type *Leptococcus* PsbA variants, we built a  
198 phylogenetic tree with our *Leptococcus*-like PsbA sequences and both A-type and B'-type reference  
199 sequences (Figure 2). 17 of the 22 PsbA sequences in our data were most closely related to PsbA from  
200 one of the two *Leptococcus* reference strains and, in general, we did not observe a preference for either  
201 PsbA1 or PsbA2 with temperature. The B'-type PsbA2 and A-type PsbA1 references formed a separate  
202 clade containing six of our PsbA sequences. Bifurcating in a deeper branch from this clade, the A-type  
203 PsbA2 and B'-type PsbA1 references grouped with the remaining eight *Leptococcus* PsbA sequences.  
204 Within each of those clades, several sequences branch outside of the PsbA1 and PsbA2 reference  
205 sequences, suggesting a third PsbA sequence is present in our metagenomes.

206 Anoxygenic photosynthesis requires only one light-harvesting reaction center complex—type I or  
207 type II. *psc* genes encode Type I reaction centers (in Chlorobi, Firmicutes (*Heliobacteriaceae*),  
208 Acidobacteria (*Candidatus Chloracidobacterium thermophilum*)), while *puf* genes encode type-II reaction  
209 centers (in Chloroflexi, (class *Chloroflexales*, and *Candidatus Thermofonsia*), Proteobacteria (*Alpha*-,  
210 *Beta*-, and *Gamma*-) and Gemmatimonadetes (strain AP64)) (1,36–38). In our metagenomes, *psc* genes  
211 were more abundant in sites below 63°C while *puf* genes were abundant in all sites (Figure 1, Figure S1).  
212 Similar to *psb* genes, we recovered more copies of both *psc* and *puf* genes in sites < 63°C, suggesting  
213 diversity (or taxa) abundance increases with decreasing temperature. These results are consistent with our  
214 previous work that suggest phototrophs with type-I RCs are less abundant at high temperatures, while the  
215 type-II phototrophic Chloroflexi are highly abundant and diverse in 60-72°C hot springs (8,12).

216 In anoxygenic phototrophs with type II reaction centers, genes that encode essential functions  
217 differ between species. *pufL* and *pufM* are common to all type-II phototrophs and encode PufL and PufM  
218 membrane-spanning proteins that bind bacteriochlorophylls in type-II reaction centers (39). Both *pufL*  
219 and *pufM* genes are required to form a functional reaction center yet in our data, we recovered 5:1  
220 *pufM:pufL* genes in sites > 63°C (Figure 1). In *Roseiflexus* and *Kouleothrix* species *pufL* and *pufM* are  
221 fused into a single gene (37). We recovered five fused *pufLM* sequences in our dataset (Figure 1) that  
222 were represented in five of our eight sites. They were the most abundant in 626A and 626B, two sites in  
223 the Rabbit Creek area, where *Roseiflexus* are common and abundant (Bennett *et al.* 2020).

224



225 *Abundance and diversity of carbon cycle machinery varies with temperature*

226 Photoautotrophic bacteria fix the majority of carbon in alkaline geothermal springs by using one  
227 of three different pathways. Cyanobacteria use the Calvin-Benson-Bassham (CBB) cycle, Chlorobi use  
228 the reductive tricarboxylic acid (rTCA) cycle and photoautotrophic Chloroflexi use the 3-  
229 hydroxypropionate bicycle (3HPB) (reviewed in (41)) with the exception of CBB-containing *Kouleothrix*  
230 *aurantiaca* isolated from activated sludge (42). In our data, mean reads mapped for the CBB cycle  
231 surpassed the 3HPB and rTCA in all but two sites (626C and 626B) (Figure 3B). In the CBB cycle, the  
232 carboxylation step is carried out by the enzyme ribulose 1,5 bisphosphate carboxylase/oxygenase  
233 (RuBisCO, encoded by *rbcL* [large subunit] and *rbcS* [small subunit] genes). RuBisCO, the workhorse of  
234 the CBB cycle, is highly abundant in several environments on Earth and considered to be the most  
235 abundant protein in the world (43). In hot springs, specifically, *Leptococcus* species have evolved a  
236 thermotolerant form of RuBisCO that functions at up to 74°C – toxic intermediates (reactive oxygen  
237 species) form above this temperature (44,45). Phosphoribulokinase (encoded by the *prk* gene), a second  
238 essential step of the CBB cycle, does not appear to have an upper temperature limit beyond that of  
239 phototrophy, but is likely only present in organisms that use the CBB cycle (46).

240 While it is known that characteristic enzymes in the CBB cycle function at high temperatures, we  
241 sought to compare abundances of these genes across sites (Figure 3C). We observed larger mean  
242 abundances of *rbcS* than *rbcL*, but more copies of *rbcL* than *rbcS*, suggesting the CBB taxa could contain  
243 more copies of *rbcL*, or multiple forms of RuBisCO are present in these high temperature, alkaline hot  
244 springs. Furthermore, we computed the ratio of *rbcL:rbcS* and *prk:rbcS* with temperature (Figure S2) and  
245 found that both ratios were higher (more *rbcL* and *prk* genes) in sites with low temperature. At present,  
246 four forms of RuBisCO exist in nature: form I RuBisCO (cyanobacteria, alpha-, beta-, gamma-  
247 proteobacteria, chloroflexi and higher eukaryotes) is encoded by both *rbcL* and *rbcS* genes, while forms II  
248 (alpha-, beta-, gamma- proteobacteria) and III (only in methanogenic archaea) contain only the large  
249 subunit (encoded by *rbcL* genes) (47). Our data suggest that more distinct CBB taxa are present at low  
250 temperatures, or that form II or III RuBisCO taxa (*rbcL* only, non-cyanobacterial CBB cycle) persist at  
251 lower temperatures.

252 Chlorobi are the only phototrophic group that fix carbon via the rTCA cycle, but this pathway is  
253 distributed across several non-phototrophic lineages that are often recovered from hot springs (e.g. in the  
254 Aquificae phylum; 12,17). In general, reads associated with the rTCA cycle were low compared to other  
255 two pathways (Figure 3B). Additionally, we recovered very few reads associated with ATP citrate-lyase,  
256 an irreversible and critical enzyme in the rTCA cycle (Figure S3), suggesting few taxa fix carbon using  
257 this pathway between 62-71°C.

258           In contrast to the rTCA cycle, reads associated with genes involved in 3HPB, the carbon fixation  
259 pathway in most photoautotrophic Chloroflexi, were widespread and abundant in our metagenomes  
260 (Figure 3B). The 3HPB requires two carboxylation steps (via acetyl-CoA carboxylase and propionyl-CoA  
261 carboxylase), followed by steps that generate 3-hydroxypropionate and glyoxylate intermediates (48). To  
262 this end, we surveyed the abundance of three genes that are involved in these critical steps in the pathway:  
263 malyl-CoA/citramyl-CoA lyase (*mcl* gene, glyoxylate generation), propionyl-CoA carboxylase (*pccA*  
264 gene, CO<sub>2</sub> carboxylation) and 3-hydroxypropionate dehydrogenase (*mcr* gene, 3-hydroxypropionate  
265 generation). We found that the mean abundances of *mcr* showed high variation between sites (Kruskal-  
266 Wallis H test,  $p < 0.05$ ), while *pccA* and *mcl* abundances were relatively consistent across sites (Figure  
267 3D). It was previously thought that the 3HPB pathway was only present in Archaea until *Chloroflexus*  
268 isolates were grown autotrophically using the 3HPB (48,49). While *Roseiflexus castenholzii* has not been  
269 grown without acetate (50), transcripts for the 3HPB have been recovered from metatranscriptomes of  
270 *Roseiflexus* species *in situ* (14). Previous work has shown that *Roseiflexus* and *Chloroflexus* species are  
271 abundant in alkaline hot springs  $>60^{\circ}\text{C}$  and  $^{13}\text{C}$  fractionation values suggest the 3HPB could be active in  
272 these sites (8,14,20).

273           Years of research on primary productivity in hot springs has shown that autotrophic bacteria  
274 produce carbon isotope fractionation values that correspond to specific carbon fixation pathways  
275 (reviewed in (20)). To test our hypothesis that the CBB cycle is more prominent in samples  $> 68^{\circ}\text{C}$  and  
276 the 3HPB in samples  $< 63^{\circ}\text{C}$ , we compared the isotopic fractionation of  $^{13}\text{C}$  in our samples to  
277 fractionation values of characterized isolates (Figure 3A) (12). Carbon isotope fractionation in high  
278 temperature samples ( $>68^{\circ}\text{C}$ ) were similar to fractionation of YNP isolate *Synechococcus lividis* grown  
279 autotrophically at  $70^{\circ}\text{C}$  (51), while the low temperature samples grouped together within range of  
280 *Chloroflexus* 3HPB fractionation values at  $55^{\circ}\text{C}$  (15). Carbon isotope fractionation of isolates fixing  
281 carbon via the 3HPB have not been reported within range of our sites, but both the abundance of *puf*  
282 genes (Figure 1), 3HPB genes in our samples (Figure 3D) and  $^{13}\text{C}$  fractionation data suggest this pathway  
283 in phototrophic Chloroflexi could play an important role in primary productivity in alkaline hot springs  
284  $>62^{\circ}\text{C}$ .

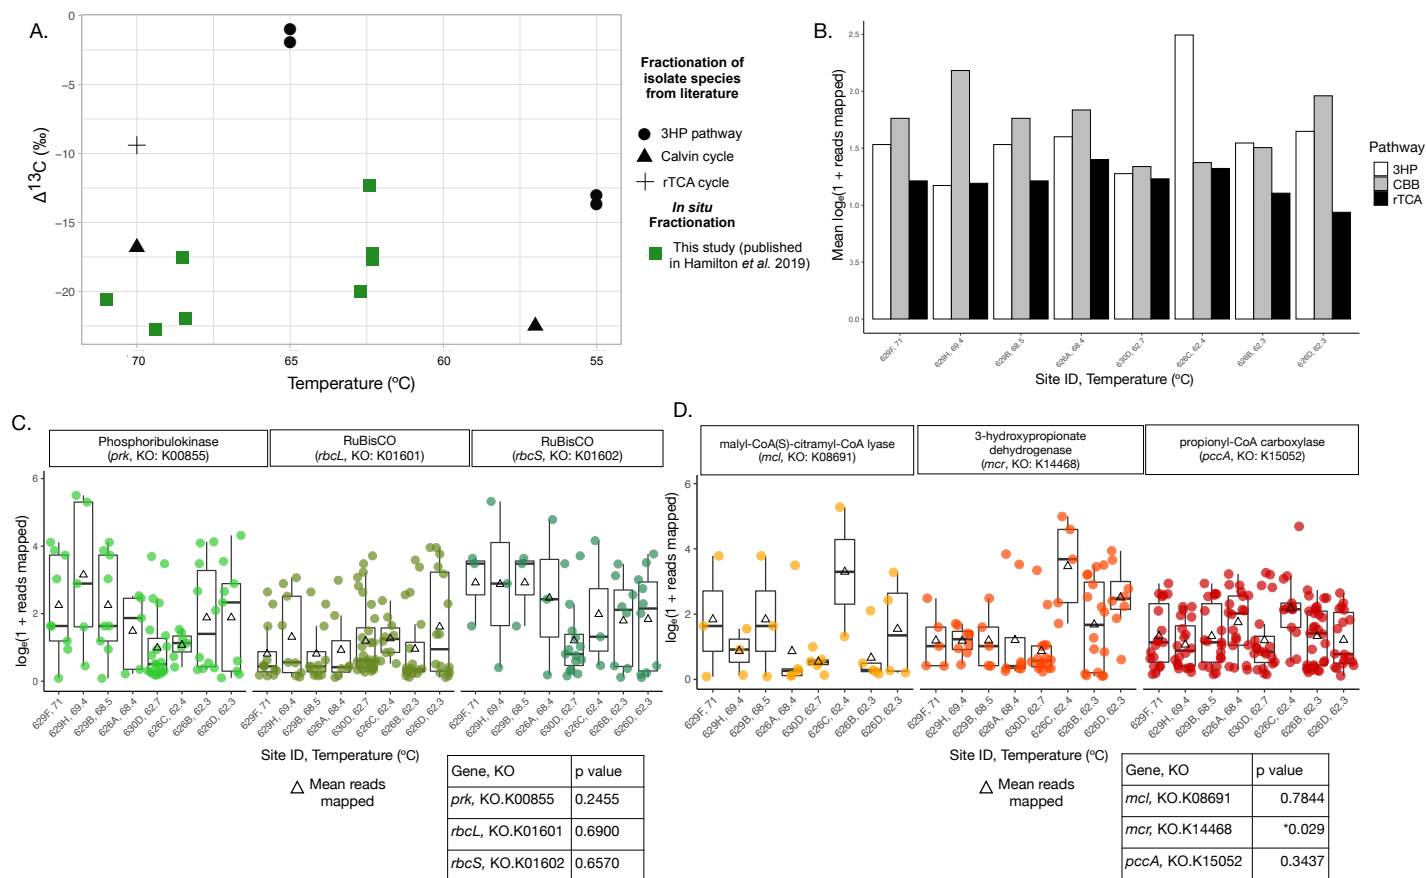

**Figure 3.  $^{13}\text{C}$  isotopic signatures and distribution of genes involved in phototrophic carbon fixation pathways.**

(A) Carbon stable isotope signals of biomass are plotted by site temperature. (B) The mean abundance (natural log of 1 + reads mapped) for three photoautotrophic carbon fixation pathways are shaded by pathway. Mean abundances are calculated from three representative genes for each pathway shown in (B), the abundance (natural log of 1 + reads mapped) of genes that encode for the Calvin cycle (C) and the 3-hydroxypropionate bicycle (D) are shown as box plots for each site. Triangles represent the mean abundance for the gene set and dots represent individual gene abundances, shaded by the genes. Box plot outliers were removed. Sites are ordered by decreasing temperature. Below each box plot are tables of Kruskal-Wallis H test significance values (p-value) for each gene.

285

286 *Deeply-branching nifH genes are abundant in alkaline hot springs*

287 We quantified the distribution and abundance of *nifH* genes in eight metagenome assemblies,  
 288 spanning six alkaline hot springs with temperatures from 62 to 71°C to determine if *nifH* abundances vary  
 289 with temperature (Figure S4). We recovered more *nifH* genes in sites below 63°C (Figure S5B) while the  
 290 mean abundance of *nifH* was highest in 626A and lowest in 629H, both sites with temperatures > 68°C.  
 291 Spearman-rank correlations of our *nifH* genes with temperature, sulfide, total iron and molybdenum  
 292 revealed that none of these environmental parameters correlated with abundance of *nifH* genes in our  
 293 samples (Figure S4C). Together, these results suggest that *nifH* abundance does not correlate with  
 294 environmental parameters, but more diverse diazotrophs are present at lower temperatures.

295 To determine the taxa associated with our *nifH* sequences, we constructed a phylogenetic tree  
296 with translated *nifH* gene sequences (Figure 4). Two NifH sequences were closely-related to  
297 cyanobacteria species, notably *Leptococcus* JA-3-3Ab, a common constituent of alkaline hot springs >  
298 60°C and a known diazotroph (6,25). Four of the five most abundant NifH sequences in our dataset were  
299 closely related to *Roseiflexus* species from both high and low temperature sites (Figure 4). *nifH* genes are  
300 present in *Roseiflexus* genomes and *nifH* transcripts *Rosiefleus* have been observed *in situ* (14), but they  
301 lack the full gene suite required to build a functional nitrogenase— *Roseiflexus* genomes only encode  
302 *nifHBDK* (52) – and neither of the two isolate species (*R. castenholzii* or *Roseiflexus* sp. RS-1) can grow  
303 in the absence of fixed nitrogen (50,52), therefore, it is unlikely that *Roseiflexus* fix nitrogen. However,  
304 *Roseiflexus nifH* could be important to determining the evolutionary history of nitrogenase – *nifH* shares  
305 an evolutionary history with *bchL*, a gene involved in chlorophyll biosynthesis in anoxygenic phototrophs  
306 and BchL and NifH have high sequence and structure similarity but are functionally different (53). Lastly,  
307 while *Roseiflexus* species lack a full gene set to fix nitrogen in alkaline hot genes are abundant in our data  
308 and *nifH* mRNA has been detected in similar hot springs (14), suggesting NifH serves a functional  
309 purpose that remains unknown.

310 Finally, the third most abundant *nifH* in our dataset (629B #3511) formed a separate clade near,  
311 but not within, the cyanobacteria clade (Figure 4). Protein BLAST analysis (27) revealed that these NifH  
312 sequences are Aquificae-like NifH, a deep-branching chemolithoautotrophic group with diazotrophic  
313 representatives found in high temperature (>70°C) hot springs (17). Previous analysis of *nifH* genes  
314 across all domains of life suggested Aquificae are the oldest extant diazotrophic bacteria (19). Thus, our  
315 data contain several *nifH*-containing lineages that are of great importance for solving the evolutionary  
316 history of nitrogen fixation.

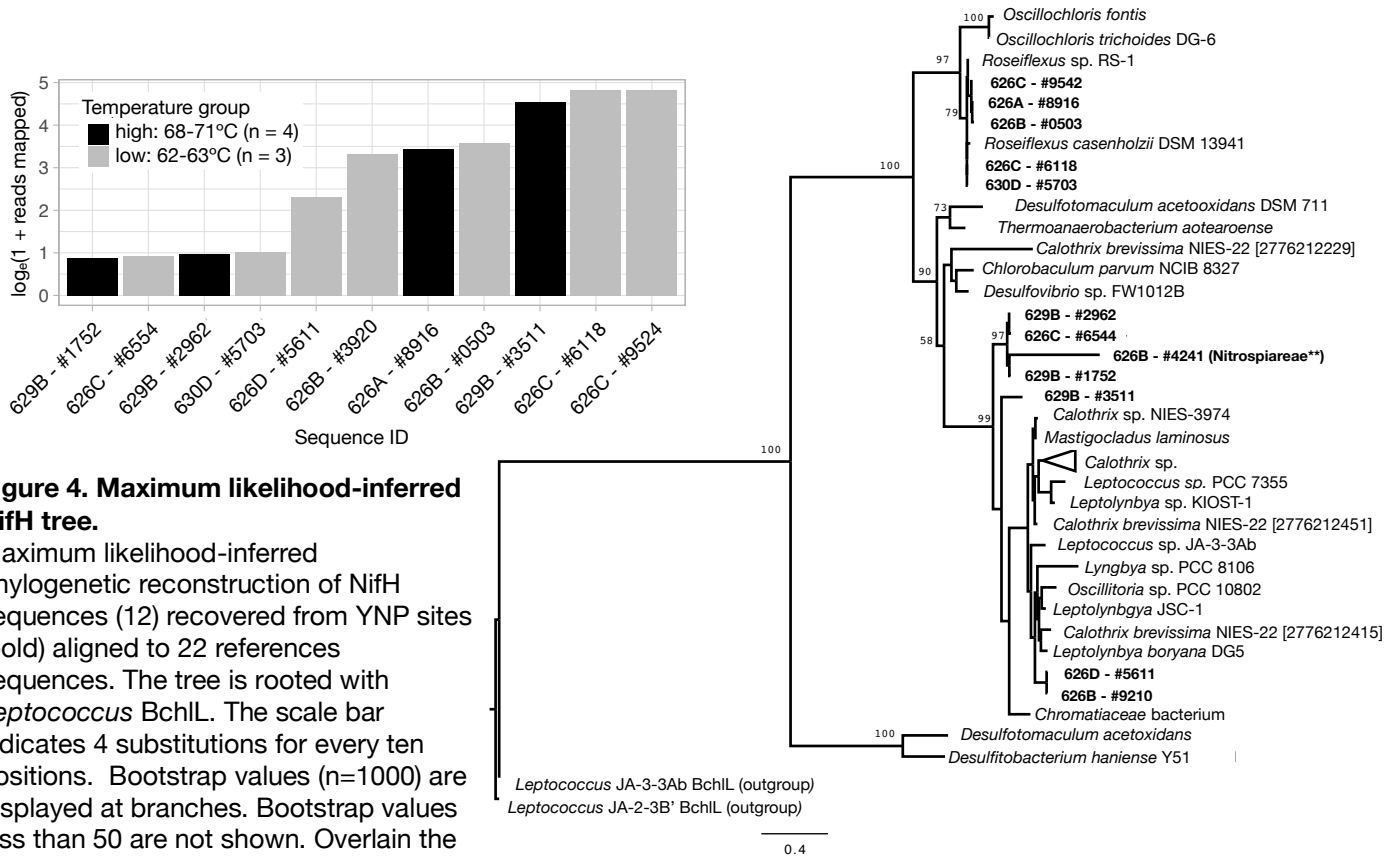

317

318

319 *Metagenome assembled genomes reveal distinct differences between Chloroflexus and Roseiflexus species*

320 Phototrophic Chloroflexi species are widely distributed and abundant in alkaline hot springs >

321 60°C, but their contribution to carbon and nitrogen cycling in hot springs is not well understood. Through

322 metagenome assembly data, we have begun to piece together the metabolic potential of phototrophic

323 Chloroflexi *in situ*. We have shown that genes for phototrophic machinery in cyanobacteria and

324 Chloroflexi are abundant throughout the eight hot spring samples surveyed here. Key genes in

325 photoautotrophic Chloroflexi (3HPB pathway) genomes are variable with temperature (*mcr* is less

326 abundant in low temperature sites, Figure 3D), but generally abundant across sites. Additionally, a large

327 proportion of the NifH sequences we recovered were most closely related to *Roseiflexus* species. To

328 examine the distribution of specific Chloroflexi taxa, we binned our metagenome assemblies and

329 quantified the abundance of bins classified as Chloroflexi taxa in each site (Figure 5A, S5, Table S2).

330 Furthermore, we conducted a BLASTN search (27) of the Chloroflexi metagenome bins for genes

331 involved in carbon fixation, Type-II reaction center photosynthesis and NifH/BchL protein families  
332 (Figure 5B).

333 We recovered two putative, phototrophic Chloroflexi genera from our binning analysis:  
334 *Roseiflexus* and *Chloroflexus*. These two genera were represented by several distinct bins across multiple  
335 sites (Figure 5A, Table S2). *Roseiflexus* and *Chloroflexus* bins were more abundant than non-phototrophic  
336 Chloroflexi, consistent with our gene analysis above and previous work in alkaline hot springs (8,9,12).  
337 *Roseiflexus* bins comprise a large proportion of the metagenome in several sites (Figure 4A), while  
338 *Chloroflexus* bins were generally more abundant in sites > 68°C. Furthermore, *Roseiflexus* bins appear to  
339 be functionally different than *Chloroflexus* bins in our metagenomes (Figure 5B). Each *Roseiflexus* bin  
340 contained fused *pufLM* sequences, all three 3HPB genes from our assembly analysis (*mcl*, *mcr* and *pccA*)  
341 and *nifH* sequences. Not surprisingly, none of our *Roseiflexus* bins contained genes involved in the CBB  
342 cycle, which has not been found in any of the sequenced *Roseiflexus* genomes (50,52). Since *Roseiflexus*  
343 are dispersed throughout these sites (12), abundant in our metagenomes (Figure 5A) and encode the  
344 3HPB pathway, it is likely that they are living autotrophically or mixotrophically *in situ*.

345 Alternatively, several of our *Chloroflexus* bins harbored a mosaic of genes involved in  
346 photoautotrophy. Each *Chloroflexus* bin contained *pufL* and *pufM* genes, which would support the  
347 characteristic phototrophic lifestyle of this group (54). However, three of the five *Chloroflexus* bins were  
348 missing genes that are critical to the 3HPB pathway, but the bins contained *prk* or *rbcl* genes (Figure  
349 4B). This suggests that a handful of our *Chloroflexus* may have lost a functional 3HPB pathway, but are  
350 instead operating a modified CBB cycle to fix carbon, which has been suggested in other systems (55).  
351 Previous studies have implied that photoautotrophy is a characteristic of *Chloroflexus*, while *Roseiflexus*  
352 are photoheterotrophs (6,14,50,56), but our metagenome bin analysis coupled with <sup>13</sup>C fractionation  
353 suggest *Roseiflexus* could be contributing to carbon fixation *in situ* and that *Chloroflexus* strains could be  
354 using the CBB cycle to fix carbon. Lastly, nitrogen fixation and bacteriochlorophyll synthesis genes share  
355 an evolutionary history (57); therefore, we would expect that closely related species like *Roseiflexus* and  
356 *Chloroflexus* would both contain these genes. Yet, our data suggest that only *Roseiflexus* encode both  
357 *nifH* and *bchL*, while *Chloroflexus* contain only *bchL* genes, which is in accordance with previous work  
358 (50,52,53).

359 While phototrophy in phylum Chloroflexi is thought to be limited to the class *Chloroflexales*, a draft  
360 genome classified within the candidate genus *Roseilinea*, was recovered from a sulfidic spring and  
361 appears to live a photoheterotrophic lifestyle (13). *Roseilinea* is within the non-phototrophic class  
362 Anaerolineae and is only distantly related to *Chloroflexus* and *Roseiflexus* species. Two of our metagenome bins  
363 were classified as 'Anaerolineae unclassified' (626A.11 and 626B.23) and both contain *pufL* and *bchX* sequences,  
364 suggesting they are likely within the novel *Roseilinea* genus. Both of these alkaline sites were low in sulfide, which

365 differs from the acidic and sulfidic Japanese hot springs where the *Ca. Roseilinea mizusawaensis* AA3\_104  
 366 genome was recovered (13). Additionally, our metagenomes contained several unclassified or novel Chloroflexi  
 367 bins (Figure 4, S6, Table S2), suggesting high temperature alkaline, hot springs are a suitable environment to tease  
 368 apart the physiology of novel, phototrophic Chloroflexi *in situ*.

369 In summary, our metagenome data indicate a decrease in the diversity but not necessarily in the  
 370 abundance of photoautotrophs with increasing temperature: genes associated with cyanobacteria (*psb* and  
 371 CBB pathway genes) were more diverse at lower temperatures, but abundant across sites while key genes  
 372 in the 3HPB pathway are present between 60-71°C Our data are consistent with high temperature  
 373 cyanobacteria are highly adapted to specific temperatures in alkaline hot springs and suggest temperature  
 374 selects for specific Chloroflexi taxa as well: *Chloroflexus* bins were most abundant in sites below 63°C  
 375 while *Roseiflexus* bins that contain genes necessary for the 3HPB pathway were abundant in sites with  
 376 varying temperatures. Furthermore, *nifH* genes were abundant across sites, regardless of site temperature  
 377 and *Roseiflexus*-like NifH were among the most abundant in our data. While *Roseiflexus* are likely not  
 378 fixing nitrogen *in situ*, *nifH*-containing *Roseiflexus* could be critical to solving the evolutionary puzzle of  
 379 nitrogen fixation in bacteria. While previous work has suggested that *Roseiflexus* and *Chloroflexus* are  
 380 heterotrophs and autotrophs, respectively, our work suggests that both taxa could live a mixotrophic  
 381 lifestyle *in situ*.

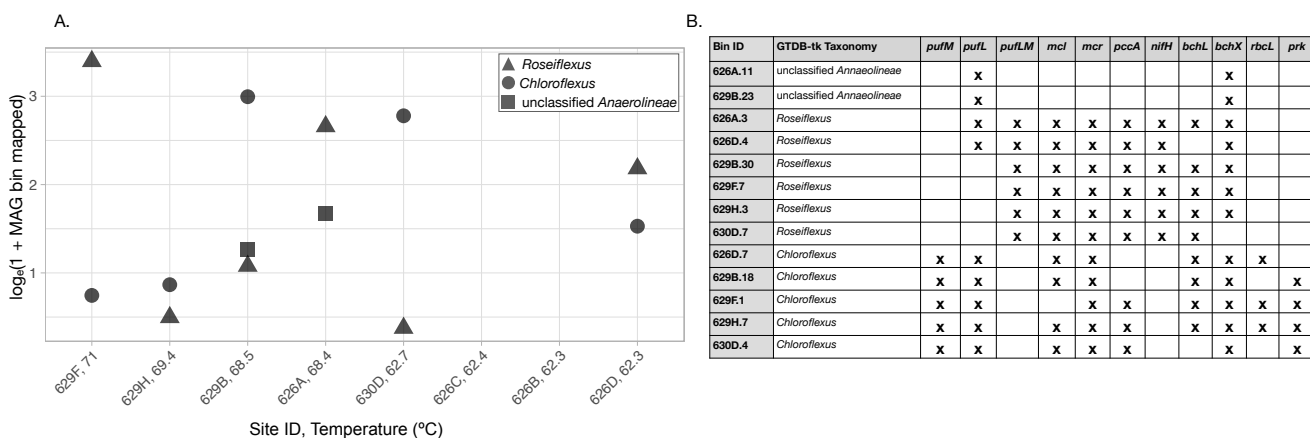

**Figure 5. Phototrophic Chloroflexi bins have distinct distributions with temperature.**

(A) Metagenome bins were mapped to assemblies to determine the proportion of the metagenome accounted for by that bin and natural log (1 + reads mapped) transformed. Each point represents an individual MAG (see Table S2). MAGs are plotted for each site and sites are ordered by decreasing temperature. GTDB-tk assigned taxonomy is differentiated by shape. (B) BLASTN hits for select genes in the metagenome bin. Note: *rbcS* was not recovered in any of the bins and is, thus, excluded from the table.

382

383

## 384 **Materials and Methods**

### 385 *Data collection, geochemistry and sample processing*

386 Biomass from eight sites in YNP (Table 1) were collected and processed as previously described  
387 (10). Briefly, samples were collected in 2017 using sterilized forceps or pliers and stored on dry ice in  
388 transit. DNA (~250mg) was extracted using the QIAgen powersoil kit following the manufacturer's  
389 protocol. Sulfide, Fe<sup>2+</sup>, and dissolved silica were measured onsite using a DR1900 portable  
390 spectrophotometer (Hach Company, Loveland, CO). Water samples were filtered through 0.2- $\mu$ m  
391 polyethersulfone syringe filters (VWR International, Radnor, PA, USA) and analyzed for dissolved  
392 inorganic carbon (DIC) concentration,  $\delta^{13}\text{C}$  and  $\delta^{15}\text{N}$  as described previously (20). Field blanks comprised  
393 of filtered 18.2 M $\Omega$ /cm deionized water, transported to the field in 1-liter Nalgene bottles (acid washed as  
394 described above), were collected onsite using the equipment and techniques described above.

395

### 396 *Metagenome sequencing, assembly and binning*

397 Total DNA for eight samples was submitted to the University of Minnesota Genomics Center (St.  
398 Paul, Minnesota, UMGC) for metagenomic sequencing with an Illumina HiSeq 2500. The UMGC  
399 prepared dual indexed Nextera XT DNA libraries following the manufacturer's instructions for each  
400 sample. The samples were sequenced on two lanes, generating >220M 1x125 bp reads. The mean quality  
401 scores were  $\geq$ Q30 for all libraries. Reads were trimmed using Sickle (v. 1.33) with a PHRED SCORE >  
402 20 and a minimum length threshold of 50 (58) and assembled using SPades (v. 3.11.0) (59) using the  
403 default parameters. Initial binning of metagenome assemblies was conducted using Metabat2 (v.  
404 2.12.1)(60) and assessed for completeness and contamination via CheckM (v. 1.1.3) (61). Bins were  
405 considered clean if they were <10% contaminated and > 70% complete – bins that did not meet this  
406 threshold were further refined using DASTool (v. 1.1.2)(62). DASTool takes bins from multiple binning  
407 algorithms and creates a set of 'best' bins. To run DASTool, we re-binned assemblies containing 'unclean'  
408 bins with MaxBin (v. 1.2.9) (63) and CONCOCT (v 1.0.0)(64), in addition to MetaBat, and input the bins  
409 from three binning algorithms into DASTool following the default settings. DASTool bins were assess for  
410 quality via CheckM. Quality-filtered sequence reads mapped to each bin in a sample by the program  
411 BBMap (65) were used to calculate percent mapped reads as a proxy for bin relative abundance. All bins  
412 were assigned taxonomy using GTDB-tk (v 1.3.0) (66). Final bin classification and statistics are displayed  
413 in Table S2. A BLASTN search using the default settings (27) for photosynthesis and *nifH* gene families  
414 was conducted genes from isolate genomes (see Supplemental material).

415

416



#### 417 *Annotation and comparison of functional genes*

418 Metagenome assemblies for eight sites (Table 1, Table S1) were submitted to the Joint Genome  
419 Institute for structural and functional annotation via the DOE-JGI Microbial Genome Annotation  
420 Pipeline. Briefly, open reading frames (ORFs) were predicted using Prodigal (67) and the resulting amino  
421 acid sequences were assigned functional annotations. Select genes (see supplemental files for complete  
422 list and KEGG IDs) involved in three carbon fixation pathways (the Calvin Cycle, 3-Hydroxypropionate  
423 Bicycle, and the reverse Tricarboxylic Acid cycle), nitrogen fixation and photosynthesis were queried in  
424 the annotated assemblies. Genes of interest were retrieved using search tools on the Joint Genome  
425 Institute web interface and known KEGG Orthologies. Metagenome reads were mapped to each JGI ORF  
426 using Bowtie2 (68). All reads were mapped at > 90% alignment rate.

427 To determine abundance of select genes involved in photosynthesis, carbon fixation, and nitrogen  
428 fixation, number of reads mapped to genes of interest were calculated using the pileup.sh script in  
429 BBTools (65). In order to directly compare genes of interest, genes were normalized by gene length and  
430 metagenome size using the following equation:

$$431$$
$$432 \frac{\text{reads mapped to gene}}{\text{gene length}} \times \left( \sum \frac{1}{\frac{\text{reads mapped to each gene}}{\text{length of each gene}}} \right) \times 10^6$$
$$433$$
$$434$$
$$435$$

436 If multiple ORFs were assigned to a functional annotation, the normalized read abundance for that  
437 functional annotation was averaged. All analysis of functional genes, plotting and statistical analysis was  
438 conducted in R v3.6.1(69) using the following packages: *tidyverse* (70), *ggplot2* (71) and *vegan* (72). All  
439 metagenome assemblies are available on JGI (see Table 1, Table S1).

440

#### 441 *Phylogenomic tree construction*

442 Phylogenetic trees for both NifH and PsbA were built by compiling the proteins sequences of  
443 interest from the functionally annotated metagenome assemblies with reference protein sequences.  
444 Reference sequences were obtained on UniPort (73). Briefly, sequences < 200 amino acids were removed,  
445 sequences were aligned with MUSCLE v3.8.31(default parameters) (74) and alignments were trimmed  
446 using Gblocks (default parameters with the exception of *-b5-h*) (75). Phylogenetic analysis with bootstrap  
447 support (n=1000) of trimmed, aligned protein sequences was conducted using RAxML (v. 8.2.11) (76)  
448 using the PROTGAMMAJTTF substitution model. The subsequent newick file was edited using FigTree  
449 (v. 1.4.4) (77) to generate trees.

450

451 **Acknowledgements**

452 T.L.H. conducts research in Yellowstone National Park under research permit YELL-2018-SCI-7020  
453 issued by the Yellowstone Research Permit Office and reviewed annually. This work was supported by  
454 the University of Minnesota. The authors acknowledge the Minnesota Supercomputing Institute (MSI) at  
455 the University of Minnesota for providing resources that contributed to the research results reported  
456 within this paper. We are grateful to the entire staff of the Yellowstone Research Permit Office for  
457 facilitating the permitting process to perform research in YNP. Special thanks to Annie Carlson and Erik  
458 Oberg in the Yellowstone Research Permit Office. We would like to thank J. Havig, L. Brengman, C.  
459 Grettenberger, L. Seyler, and J. Kuether for technical assistance in the field, A. Borowski and K. Quinn  
460 for assistance processing samples in the lab and H. Sauer for troubleshooting statistical analyses.

461

462 **AUTHOR CONTRIBUTIONS**

463 A.C.B and T.L.H. designed the study and completed the laboratory analyses. A.C.B. and T.L.H. collected  
464 samples and performed the field work. A.C.B, S.K.M, E.K. and T.L.H. analyzed the data. A.C.B  
465 interpreted the data and wrote the manuscript with contributions from S.K.M, E.K. and T.L.H.

466

467 **COMPETING FINANCIAL INTERESTS**

468 The authors declare no competing financial interests.

469

470 **MATERIALS & CORRESPONDENCE**

471 Correspondence and requests for materials should be addressed to T.L.H.: Trinity L. Hamilton.  
472 Department of Plant and Microbial Biology, University of Minnesota, St. Paul, USA, 55108.  
473 Phone: +16126256372\_Email: trinityh@umn.edu

474

475

476

477

478

479

480

481

482

483

484

485 **SUPPLEMENTAL FIGURE LEGENDS**

486

487 Table S1. Metagenome assembly statistics.

488

489 Figure S1. Type I reaction center genes.

490 The overall abundance (natural log of 1 + reads mapped) of type I anoxygenic photosynthesis reaction

491 centers are shown as box plots for each site. Triangles represent the mean abundance for the gene set and

492 dots represent individual gene abundances, shaded by reaction center gene. Box plot outliers were

493 removed. Sites are ordered by decreasing temperature.

494

495 Figure S2. Ratio of CBB genes with temperature.

496 The ratio of *rbcS* genes (x axis) to both *rbcL* and *prk* genes (y axis) is shown. Points are shaded by site

497 temperature.

498

499 Figure S3. rTCA cycle gene distribution with temperature.

500 The mean abundance (natural log of 1 + reads mapped) for the rTCA cycle plotted as boxplots for each

501 site. Triangles represent the mean abundance for the gene set and dots represent individual gene

502 abundances, shaded by gene. Box plot outliers were removed. Sites are ordered by decreasing

503 temperature. Kruskal-Wallis H test significance values (p-value) for each gene are displayed to the right

504 of the boxplot.

505

506 Figure S4. Distribution of *nifH* and alpha diversity of genes with temperature.

507 (A) Natural log (1 + reads mapped) for *nifH* genes recovered from each site, ordered by decreasing

508 temperature displayed as boxplots. Triangles represent the mean. (B) Distinct *nifH* genes recovered from

509 each site, ordered by decreasing temperature. Dashed vertical line separates sites > 68°C and < 63°C. (C)

510 Spearman-rank correlations for *nifH* natural log (1 + reads mapped) for temperature, molybdenum, sulfide

511 and total iron in each site. Shaded area represents the standard error,  $R^2$  and p-values are displayed in the

512 upper right corner of each plot.

513

514 Figure S5. Abundance and alpha diversity of all Chloroflexi bins.

515 Metagenome assembled genomes (MAGs) were mapped to assemblies to determine the proportion of the

516 metagenome accounted for by that bin and natural log (1 + reads mapped) transformed for all Chloroflexi

517 bins. Phototrophic Chloroflexi includes class *Chloroflexales* and Non-Phototrophic Chloroflexi includes

518 the remaining classes. Each point represents an individual MAG (see Table S2). MAGs are plotted for

519 each site and sites are ordered by decreasing temperature. GTDB-tk assigned taxonomy (“Genus”) is  
520 differentiated by shaded points. (B) Number of distinct Chloroflexi bins in each site is plotted, ordered by  
521 temperature.

522

523 Table S2. Chloroflexi bins statistics determined by CheckM and GTDB-tk.

524

525

- 526 1. Tank M, Thiel V, Ward DM, Bryant DA. A Panoply of Phototrophs: An Overview of the  
527 Thermophilic Chlorophototrophs of the Microbial Mats of Alkaline Siliceous Hot Springs in  
528 Yellowstone National Park, WY, USA Marcus. *Modern Topics in the Phototrophic Prokaryotes: Environmental and Applied Aspects*. 2017. 87–137 p.
- 530 2. Tansey MR, Brock TD. The upper temperature limit for eukaryotic organisms. *PNAS*.  
531 1972;69(9):2426–8.
- 532 3. Lyons TW, Reinhard CT, Planavsky NJ. The rise of oxygen in Earth’s early ocean and  
533 atmosphere. *Nature*. 2014;506(7488):307–15. Available from:  
534 <http://dx.doi.org/10.1038/nature13068>
- 535 4. Bhaya D, Grossman AR, Steunou AS, Khuri N, Cohan FM, Hamamura N. Population level  
536 functional diversity in a microbial community revealed by comparative genomic and metagenomic  
537 analyses. *ISME J*. 2007;1(8):703–13.
- 538 5. Liu Z, Klatt CG, Wood JM, Rusch DB, Ludwig M, Wittekindt N, et al. Metatranscriptomic  
539 analyses of chlorophototrophs of a hot-spring microbial mat. *ISME J*. 2011;5(8):1279–90.  
540 Available from: <http://dx.doi.org/10.1038/ismej.2011.37>
- 541 6. Thiel V, Wood JM, Olsen MT, Tank M, Klatt CG, Ward DM. The dark side of the mushroom  
542 spring microbial mat: Life in the shadow of chlorophototrophs. I. Microbial diversity based on 16S  
543 rRNA gene amplicons and metagenomic sequencing. *Front Microbiol*. 2016;7(6):1–25.
- 544 7. Ruff-Roberts AL, Kuenen JG, Ward DM. Distribution of cultivated and uncultivated  
545 cyanobacteria and *Chloroflexus*-like bacteria in hot spring microbial mats. *Appl Environ*  
546 *Microbiol*. 1994;60(2):697–704.
- 547 8. Bennett AC, Murugapiran SK, Hamilton TL. Temperature impacts community structure and  
548 function of phototrophic Chloroflexi and Cyanobacteria in two alkaline hot springs in Yellowstone  
549 National Park. *Environ Microbiol Rep*. 2020;12(5):503–13.
- 550 9. Miller SR, Strong AL, Jones KL, Ungerer MC. Bar-coded pyrosequencing reveals shared bacterial  
551 community properties along the temperature gradients of two alkaline hot springs in Yellowstone  
552 National Park. *Appl Environ Microbiol*. 2009

- 553 11. Thiel V, Tank M, Bryant DA. Diversity of Chlorophototrophic Bacteria Revealed in the Omics  
554 Era. *Annu Rev Plant Biol.* 2018;58. Available from: [https://doi.org/10.1146/annurev-arplant-](https://doi.org/10.1146/annurev-arplant-042817-)  
555 042817-
- 556 12. Hamilton TL, Bennett AC, Murugapiran SK, Havig JR. Anoxygenic Phototrophs Span  
557 Geochemical Gradients and Diverse Morphologies in Terrestrial Geothermal Springs. Flynn TM,  
558 editor. *mSystems.* 2019 Dec 17;4(6):e00498-19. Available from:  
559 <http://msystems.asm.org/content/4/6/e00498-19.abstract>
- 560 13. Ward, Lewis M., Fatima L-H, Kakegawa, T., McGlynn SE. Complex history of aerobic respiration  
561 and phototrophy in the Chloroflexota class Anaerolineae revealed by high-quality draft genome of  
562 *Ca. Roseilinea mizusawaensis* AA3\_104. *Biorxiv.* 2020;
- 563 14. Klatt CG, Liu Z, Ludwig M, Ku M, Jensen SI, Bryant DA, Ward DM. Temporal  
564 metatranscriptomic patterning in phototrophic Chloroflexi inhabiting a microbial mat in a  
565 geothermal spring. *Front Microbio.* 2013;1775–89.
- 566 15. Van Der Meer MTJ, Schouten S, Damsté JSS, Ward DM. Impact of carbon metabolism on <sup>13</sup>C  
567 signatures of cyanobacteria and green non-sulfur-like bacteria inhabiting a microbial mat from an  
568 alkaline siliceous hot spring in Yellowstone National Park (USA). *Environ Microbiol.*  
569 2007;9(2):482–91.
- 570 16. Steunou A-S, Bhaya D, Bateson MM, Melendrez MC, Ward DM, Brech. *In situ* analysis of  
571 nitrogen fixation and metabolic switching in unicellular thermophilic cyanobacteria inhabiting hot  
572 spring microbial mats. *PNAS.* 2006;103(7):2398–403. Available from:  
573 <http://www.pnas.org/cgi/doi/10.1073/pnas.0507513103>
- 574 17. Nishihara A, Matsuura K, Tank M, McGlynn SE, Thiel V, Haruta S. Nitrogenase activity in  
575 thermophilic chemolithoautotrophic bacteria in the phylum aquificae isolated under nitrogen-  
576 fixing conditions from nakabusa hot springs. *Microbes Environ.* 2018;33(4):394–401.
- 577 18. McGlynn SE, Boyd ES, Peters JW, Orphan VJ. Classifying the metal dependence of  
578 uncharacterized nitrogenases. *Front Microbiol.* 2012;3(JAN):1–8.
- 579 19. Boyd ES, Peters JW. New insights into the evolutionary history of biological nitrogen fixation.  
580 *Front Microbiol.* 2013;4(6):1–12.
- 581 20. Havig JR, Raymond J, Meyer-Dombard DR, Zolotova N, Shock EL. Merging isotopes and  
582 community genomics in a siliceous sinter-depositing hot spring. *J Geophys Res Biogeosciences.*  
583 2011;116(1):1–15.
- 584 21. Swingley WD, Meyer-Dombard DR, Shock EL, Alsop EB, Falenski HD, Havig JR. Coordinating  
585 environmental genomics and geochemistry reveals metabolic transitions in a hot spring ecosystem.  
586 *PLoS One.* 2012;7(6).

- 587 22. Hamilton TL, Lange RK, Boyd ES, Peters JW. Biological nitrogen fixation in acidic high-  
588 temperature geothermal springs in Yellowstone National Park, Wyoming. *Environ Microbiol.*  
589 2011;13(8):2204–15.
- 590 23. Hamilton TL, Boyd ES, Peters JW. Environmental Constraints Underpin the Distribution and  
591 Phylogenetic Diversity of *nifH* in the Yellowstone Geothermal Complex. *Microb Ecol.*  
592 2011;61(4):860–70.
- 593 24. Walter JM, Coutinho FH, Dutilh BE, Swings J, Thompson FL, Thompson CC. Ecogenomics and  
594 taxonomy of Cyanobacteria phylum. *Front Microbiol.* 2017;8(11).
- 595 25. Steunou AS, Jensen SI, Brecht E, Becraft ED, Bateson MM, Kilian O, et al. Regulation of *nif* gene  
596 expression and the energetics of N<sub>2</sub> fixation over the diel cycle in a hot spring microbial mat.  
597 *ISME J.* 2008;2(4):364–78.
- 598 26. Galambos D, Anderson RE, Reveillaud J, Huber JA. Genome-resolved metagenomics and  
599 metatranscriptomics reveal niche differentiation in functionally redundant microbial communities  
600 at deep-sea hydrothermal vents. *Environ Microbiol.* 2019;21(11):4395–410.
- 601 27. Altschul SF, Gish W, Miller W, Myers EW, Lipman DJ. Basic local alignment search tool. *J Mol*  
602 *Biol.* 1990;215(3):403–10.
- 603 28. Brock TD. Micro-organisms adapted to High Temperatures. *Nature.* 1967;214:882–5.
- 604 29. Thiel V, Tank M, Bryant DA. Diversity of Chlorophototrophic Bacteria Revealed in the Omics  
605 Era. *Annu Rev Plant Biol.* 2018;69(1).
- 606 30. Mulkidjanian AY, Koonin E V., Makarova KS, Mekhedov SL, Sorokin A, Wolf YI. The  
607 cyanobacterial genome core and the origin of photosynthesis. *PNAS.* 2006;103(35):13126–31.
- 608 31. Mulo P, Sakurai I, Aro EM. Strategies for *psbA* gene expression in cyanobacteria, green algae and  
609 higher plants: From transcription to PSII repair. *Biochim Biophys Acta – Bioenerg.*  
610 2012;1817(1):247–57. Available from: <http://dx.doi.org/10.1016/j.bbabi.2011.04.011>
- 611 32. Mulo P, Sicora C, Aro EM. Cyanobacterial *psbA* gene family: Optimization of oxygenic  
612 photosynthesis. *Cell Mol Life Sci.* 2009;66(23):3697–710.
- 613 33. Eaton-Rye JJ, Vermaas WFJ. Oligonucleotide-directed mutagenesis of *psbB*, the gene encoding  
614 CP47, employing a deletion mutant strain of the cyanobacterium *Synechocystis* sp. PCC 6803.  
615 *Plant Mol Biol.* 1991;17(6):1165–77.
- 616 34. Garczarek L, Dufresne A, Blot N, Cockshutt AM, Peyrat A, Campbell DA. Function and evolution  
617 of the *psbA* gene family in marine *Synechococcus*: *Synechococcus* sp. WH7803 as a case study.  
618 *ISME J.* 2008;2(9):937–53.
- 619 35. Allewalt JP, Bateson MM, Revsbech NP, Slack K, Ward DM. Effect of temperature and light on  
620 growth of and photosynthesis by *Synechococcus* isolates typical of those predominating in the

- 621 Octopus Spring microbial mat community of Yellowstone National Park. *Appl Environ Microbiol.*  
622 2006;72(1):544–50.
- 623 36. Zeng Y, Feng F, Medová H, Dean J, Koblížek M. Functional type 2 photosynthetic reaction  
624 centers found in the rare bacterial phylum Gemmatimonadetes. *PNAS.* 2014;111(21):7795–800.
- 625 37. Ward LM, McGlynn SE, Ward, Lewis M, Shih PM, Hemp J, Fischer WW. Evolution of  
626 Phototrophy in the Chloroflexi Phylum Driven by Horizontal Gene Transfer. *Front Microbiol.*  
627 2018;9(2):1–16.
- 628 38. Ward LM, Cardona T, Holland-Moritz H. Evolutionary Implications of Anoxygenic Phototrophy  
629 in the Bacterial Phylum *Candidatus Eremiobacterota* (WPS-2). *Front Microbiol.* 2019;10(7):1–  
630 12.
- 631 39. Imhoff JF, Rahn T, Künzel S, Neulinger SC. Photosynthesis is widely distributed among  
632 Proteobacteria as demonstrated by the phylogeny of PufLM reaction center proteins. *Front*  
633 *Microbiol.* 2018;8(1):1–11.
- 634 40. Tsukatani Y, Matsuura K, Masuda S, Shimada K, Hiraishi A, Nagashima KVP. Phylogenetic  
635 distribution of unusual triheme to tetraheme cytochrome subunit in the reaction center complex of  
636 purple photosynthetic bacteria. *Photosynth Res.* 2004;79(1):83–91.
- 637 41. Fuchs G. Alternative Pathways of Carbon Dioxide Fixation: Insights into the Early Evolution of  
638 Life? *Annual Review of Microbiology.* 2011. 65:631–658 p. Available from:  
639 <http://www.annualreviews.org/doi/10.1146/annurev-micro-090110-102801>
- 640 42. Ward LM, Idei A, Nakagawa M, Ueno Y, Fischer WW, McGlynn SE. Geochemical and  
641 metagenomic characterization of Jinata onsen, a proterozoic- analog hot spring, reveals novel  
642 microbial diversity including iron-tolerant phototrophs and thermophilic lithotrophs. *Microbes*  
643 *Environ.* 2019;34(3):278–92.
- 644 43. Ellis RJ. The most abundant protein in the world. *Trends Biochem Sci.* 1979;4(11):241–4.
- 645 44. Miller SR, McGuirl MA, Carvey D. The evolution of RuBisCO stability at the thermal limit of  
646 photoautotrophy. *Mol Biol Evol.* 2013;30(4):752–60.
- 647 45. Hamilton TL. The trouble with oxygen: The ecophysiology of extant phototrophs and implications  
648 for the evolution of oxygenic photosynthesis. *Free Radic Biol Med.* 2019;140(April):233–49.  
649 Available from: <https://doi.org/10.1016/j.freeradbiomed.2019.05.003>
- 650 46. Frolov EN, Kublanov I V., Toshchakov S V., Lunev EA, Pimenov N V., Bonch-Osmolovskaya  
651 EA, et al. Form III RubisCO-mediated transaldolase variant of the Calvin cycle in a  
652 chemolithoautotrophic bacterium. *PNAS.* 2019;116(37):18638–46.
- 653 47. Tabita FR, Hanson TE, Li H, Satagopan S, Singh J, Chan S. Function, Structure, and Evolution of  
654 the RubisCO-Like Proteins and Their RubisCO Homologs. *Microbiol Mol Biol Rev.*

- 655 2007;71(4):576–99.
- 656 48. Zarzycki J, Brecht V, Müller M, Fuchs G. Identifying the missing steps of the autotrophic 3-  
657 hydroxypropionate CO<sub>2</sub> fixation cycle in *Chloroflexus aurantiacus*. *PNAS* 2009;106(50):21317–  
658 22.
- 659 49. Hanada S, Hiraishi A, Shimada K, Masuura K. Isolation of *Chloroflexus aurantiacus* and related  
660 thermophilic phototrophic bacteria from Japanese hot springs using an improved isolation  
661 procedure. *J Gen Appl Microbiol*. 2008;41(2):119–30.
- 662 50. Hanada S, Takaichi S, Matsuura K, Nakamura K. *Roseiflexus castenholzii* gen. nov., sp. nov., a  
663 thermophilic, filamentous, photosynthetic bacterium that lacks chlorosomes. *Int J Syst Evol*  
664 *Microbiol*. 2002;52(1):187–93.
- 665 51. Pardue JW, Scalan RS, Van Baalen C, Parker PL. Maximum carbon isotope fractionation in  
666 photosynthesis by blue-green algae and a green alga. *Geochim Cosmochim Acta*. 1976;40(3):309–  
667 12.
- 668 52. Van Der Meer MTJ, Klatt CG, Wood J, Bryant DA, Bateson MM, Lammerts L. Cultivation and  
669 genomic, nutritional, and lipid biomarker characterization of *Roseiflexus* strains closely related to  
670 predominant in situ populations inhabiting yellowstone hot spring microbial mats. *J Bacteriol*.  
671 2010;192(12):3033–42.
- 672 53. Thakur S, Bothra AK, Sen A. Functional divergence outlines the evolution of novel protein  
673 function in NifH/BchL protein family. *J Biosci*. 2013;38(4):733–40.
- 674 54. Madigan MT, Brock TD. Photosynthetic sulfide oxidation by *Chloroflexus aurantiacus*, a  
675 filamentous, photosynthetic, gliding bacterium. *J Bacteriol*. 1975;122(2):782–4.
- 676 55. Shih PM, Ward LM, Fischer WW. Evolution of the 3-hydroxypropionate bicycle and recent  
677 transfer of anoxygenic photosynthesis into the Chloroflexi. *PNAS*. 2017;114(40):10749–54.
- 678 56. Klatt CG, Bryant DA, Ward DM. Comparative genomics provides evidence for the 3-  
679 hydroxypropionate autotrophic pathway in filamentous anoxygenic phototrophic bacteria and in  
680 hot spring microbial mats. *Environ Microbiol*. 2007;9(8):2067–78.
- 681 57. Burke DH, Hearst JE, Sidow A. Early evolution of photosynthesis: Clues from nitrogenase and  
682 chlorophyll iron proteins. *PNAS*. 1993;90(15):7134–8.
- 683 58. Joshi NA, Fass JN. (2011). Sickle: A sliding-window, adaptive, quality-based trimming tool for  
684 FastQ files (Version 1.33) [Software]. Available at <https://github.com/najoshi/sickle>.
- 685 59. Bankevich A, Nurk S, Antipov D, Gurevich AA, Dvorkin M, Kulikov AS. SPAdes: A New  
686 Genome Assembly Algorithm and Its Applications to Single-Cell Sequencing. *J Comput Biol*.  
687 2012;19(5):455–77.
- 688 60. Kang DD, Froula J, Egan R, Wang Z. MetaBAT, an efficient tool for accurately reconstructing



- 689 single genomes from complex microbial communities. *PeerJ*. 2015;3:e1165.
- 690 61. Parks DH, Imelfort M, Skennerton CT, Hugenholtz P, Tyson GW. CheckM: assessing the quality  
691 of microbial genomes recovered from. *Genome Res*. 2015;25:1043–55.
- 692 62. Sieber CMK, Probst AJ, Sharrar A, Thomas BC, Hess M, Tringe SG. Recovery of genomes from  
693 metagenomes via a dereplication, aggregation and scoring strategy. *Nat Microbiol*. 2018;3(7):836–  
694 43. Available from: <http://dx.doi.org/10.1038/s41564-018-0171-1>
- 695 63. Li D, Liu CM, Luo R, Sadakane K, Lam TW. MEGAHIT: An ultra-fast single-node solution for  
696 large and complex metagenomics assembly via succinct de Bruijn graph. *Bioinformatics*.  
697 2015;31(10):1674–6.
- 698 64. Alneberg J, Bjarnason BS, De Bruijn I, Schirmer M, Quick J, Ijaz UZ, et al. Binning metagenomic  
699 contigs by coverage and composition. *Nat Methods*. 2014;11(11):1144–6.
- 700 65. Bushnell B. BBMap. [sourceforge.net/projects/bbmap/](https://sourceforge.net/projects/bbmap/).
- 701 66. Chaumeil PA, Mussig AJ, Hugenholtz P, Parks DH. GTDB-Tk: A toolkit to classify genomes with  
702 the genome taxonomy database. *Bioinformatics*. 2020;36(6):1925–7.
- 703 67. Hyatt D, Chen GL, LoCascio PF, Land ML, Larimer FW, Hauser LJ. Prodigal: Prokaryotic gene  
704 recognition and translation initiation site identification. *BMC Bioinformatics*. 2010;11.
- 705 68. Langmead B, Salzberg SL. Fast gapped-read alignment with Bowtie 2. *Nat Methods*.  
706 2012;9(4):357–9.
- 707 69. R Core Team (2014). R: A language and environment for statistical computing. R Foundation for  
708 Statistical Computing, Vienna, Austria. URL <http://www.R-project.org/>.
- 709 70. Wickham H. Welcome to the tidyverse. *Journal of Open Source Software*. 2019; 4(43), 1686,  
710 <https://doi.org/10.21105/joss.01686>.
- 711 71. Wickham H. Ggplot. Media. 2009
- 712 72. The vegan package J Oksanen, R Kindt, P Legendre, B O’Hara, MHH Stevens, MJ Oksanen.  
713 Community ecology package 10 (631-637), 719.
- 714 73. Bateman A. UniProt: A worldwide hub of protein knowledge. *Nucleic Acids Res*.  
715 2019;47(D1):D506–15.
- 716 74. Edgar RC. MUSCLE: Multiple sequence alignment with high accuracy and high throughput.  
717 *Nucleic Acids Res*. 2004;32(5):1792–7.
- 718 75. Castresana, J. (2000). Selection of conserved blocks from multiple alignments for their use in  
719 phylogenetic analysis. *Molecular Biology and Evolution*. 17, 540-552.
- 720 76. Stamatakis A. RAxML version 8: A tool for phylogenetic analysis and post-analysis of large  
721 phylogenies. *Bioinformatics*. 2014;30(9):1312–3.
- 722 77. Drummond AJ, Rambaut A, Suchard M. FigTree. p. <https://beast.community/figtree>.
